# Supplementary material
Source: Research Square preprint supplement (doi:10.21203/rs.3.rs-9735682/v1)
Supplement: Supplementary file 1 [file fad72578d01937dcdbda6a46.docx]

**Appendix A**

Table A1. The following are the questionnaire dimensions and specific questions for this study

| **Variables** | **Scale-based questions** |
| --- | --- |
| A. Impact of Gen-AI on individual learning capabilities | A1. To what extent do you think that Gen-AI tools facilitate comprehension of the principles of sports techniques, including biomechanics and physiological mechanisms?  A2. The extent to which Gen-AI tools enhance learning and research efficiency is a subject that merits rigorous investigation.  A3. To what extent have Gen-AI tools had an impact on your ability to think independently? For instance, to what extent does the utilisation of artificial intelligence render the individual more dependent on external technology, thereby diminishing their capacity for independent thought?  A4. To what extent has the advent of Gen-AI influenced your propensity to pursue independent learning of novel skills? |
| B. Perspectives on future applications of Gen-AI | B1. What is the extent of your optimism regarding the development of Gen-AI in the field of physical education over the next five years?  B2. To what extent do you consider proficiency in Gen-AI tools to be a significant factor in determining your future career trajectory within sports-related domains, such as teaching, coaching, and physical therapy?  B3. To what extent do you advocate the utilisation of Gen-AI for innovation in future sports science research, for instance in the domain of simulating training outcomes and generating hypotheses?  B4. To what extent do you believe that Gen-AI has the potential to replace traditional physical education teaching methods and training guidance, such as in-person demonstrations and error correction by instructors? |
| C. Frequency of Gen-AI use across scenarios | C1. The frequency with which one employs Gen-AI tools to facilitate the design of physical education lesson plans or training programs is a pertinent question.  C2. The frequency with which one employs Gen-AI tools to facilitate the composition of physical education assignments or sports experiment reports is a pertinent question.  C3. In the process of preparing for physical education theory exams, to what extent is Gen-AI employed to clarify concepts or organise key points?  C4. The frequency with which you utilise Gen-AI tools to facilitate the comprehension of physical education literature is of interest. This may encompass the generation of summaries, the translation of foreign-language literature, or the organisation of reviews.  C5. In the initiation of coursework or physical education research projects, to what extent do you depend on Gen-AI tools as a primary source of ideas or inspiration? |
| D. Challenges and concerns about generative | D1. To what extent do you concur that Gen-AI possesses sufficient expertise and accuracy to respond to in-depth inquiries within your specific field of sports?  D2. The importance of ethical considerations in relation to generative artificial intelligence (AI) applications in the domain of sports should be assessed. The specific ethical issues that should be considered include, but are not limited to, academic integrity, the utilisation of AI-generated homework, and the utilisation of AI in competitive strategies that may be considered unfair.  D3. To what extent is the sports field subject to misinformation generated by AI tools during their utilisation? For instance, erroneous sporting regulations and obsolete training theories.  D4. The level of satisfaction with the privacy protections provided by Gen-AI when handling athletes' personal physical data and health information is a subject that merits closer examination. |
| E. Preference of using Gen-AI in complex problem-solving | E1. In the process of designing a comprehensive training programme that integrates knowledge from multiple disciplines (e.g. physiology, psychology, nutrition, and technology), what is the probability of utilising Gen-AI as the primary tool?  E2. In the context of teaching or coaching a sport with which you have no prior experience, to what extent would you be willing to rely on Gen-AI for obtaining fundamental information? |
